# Supplementary material
Source: PubMed Central journal article supplement (PMC5471140)
Supplement: NIHMS824804-supplement-01.pdf [file NIHMS824804-supplement-01.pdf]

Supplementary Data

Beta diversity analysis

|                   | Bray Curtis | Unweighted Unifrac | Weighted Unifrac |
|-------------------|-------------|--------------------|------------------|
| LZ_Diff-p         | 0.01        | 0.008              | 0.021            |
| M_POULT_Diff-p    | 0.011       | 0.004              | 0.005            |
| M_MEAT_Diff-p     | 0.026       | 0.034              | 0.049            |
| V_ORANGE_Diff-p   | 0.026       | 0.186              | 0.033            |
| LYCO_abs-b        | 0.027       | 0.118              | 0.059            |
| M221_Diff-p       | 0.028       | 0.212              | 0.091            |
| ALC_Diff-p        | 0.032       | 0.052              | 0.159            |
| M161_abs-b        | 0.035       | 0.716              | 0.003            |
| VITD_SUPP_abs-b   | 0.041       | 0.009              | 0.279            |
| CAFF_SUPP_abs-b   | 0.049       | 0.251              | 0.052            |
| CHOLN_SUPP_Diff-p | 0.064       | 0.049              | 0.351            |
| M_EGG_abs-b       | 0.073       | 0.005              | 0.26             |
| V_POTATO_Diff-p   | 0.081       | 0.011              | 0.139            |
| VB12_abs-b        | 0.084       | 0.026              | 0.042            |
| CHOLE_abs-b       | 0.131       | 0.005              | 0.281            |
| P205_abs-b        | 0.157       | 0.647              | 0.035            |
| M_FISH_LO_Diff-p  | 0.261       | 0.026              | 0.243            |
| D_MILK_Diff-p     | 0.353       | 0.379              | 0.023            |

LZ - Lutein and Zeaxanthin; M\_POULT - Poultry; M\_MEAT - Red Meat; V\_ORANGE - Orange Vegetables; LYCO - Lycopene; M221 - Paullinic Acid; ALC - Alcohol (ethanol); M161 - Palmitoleic Acid; VITD - Vitamin D; CAFF - Caffeine; CHOLN - Choline; M\_EGG - Eggs; V\_POTATO - Potatoes; VB12 - Vitamin B12; CHOLE - Cholesterol; P205 - Eicosapentaenoic Acid; M\_FISH\_LO - Low Omega-3 Fish; D\_MILK - Milk.

\_abs-b: dichotomized by value at baseline time point

\_Diff-p: dichotomized by percent change from baseline

\_SUPP\_[any of the above]: As above, but using the nutrient data including supplements.

Below are results from PERMANOVA comparing dichotomized groups of the above dietary variables. Variables that did not have OTUs with FDR  $p < 0.10$  were not included. OTUs with FDR  $p < 0.05$  are highlighted in yellow. Columns labeled 1\_median and 2\_median represent the OTU abundance medians for the low and high groups, respectively. Columns labeled 1\_mean and 2\_mean represent the OTU abundance means (proportions) for the low and high groups, respectively. Note that less abundant OTU means may sum to less than 0.000005 due to the original OTU table being generated and filtered from all samples at both time points.

## PERMANOVA

| ALC_Diff-p-h |                                                                                               | Test-Statistic | P        | FDR_P    | Bonferroni_P | 1_median | 2_median | 1_mean   | 2_mean   |
|--------------|-----------------------------------------------------------------------------------------------|----------------|----------|----------|--------------|----------|----------|----------|----------|
| L            | OTU                                                                                           |                |          |          |              |          |          |          |          |
| L3           | k__Bacteria;p__Proteobacteria;c__Epsilonproteobacteria                                        | 9.511998       | 0.002041 | 0.059199 | 0.059199     | 0.001726 | 0.000000 | 0.002418 | 0.000109 |
| L6           | k__Bacteria;p__Firmicutes;c__Clostridia;o__Clostridiales;f__Lachnospiraceae;g__Shuttleworthia | 12.382879      | 0.000433 | 0.079725 | 0.079725     | 0.000079 | 0.000000 | 0.000148 | 0.000000 |

| CHOLE_abs-B-h |                                                                                                  | Test-Statistic | P        | FDR_P    | Bonferroni_P | 1_median | 2_median | 1_mean   | 2_mean   |
|---------------|--------------------------------------------------------------------------------------------------|----------------|----------|----------|--------------|----------|----------|----------|----------|
| L             | OTU                                                                                              |                |          |          |              |          |          |          |          |
| L4            | k__Bacteria;p__Proteobacteria;c__Alphaproteobacteria;o__Sphingomonadales                         | 9.578272       | 0.001969 | 0.040191 | 0.096478     | 0.000309 | 0.000000 | 0.000490 | 0.000058 |
| L4            | k__Bacteria;p__Proteobacteria;c__Alphaproteobacteria;o__Rhodobacterales                          | 9.415884       | 0.002151 | 0.040191 | 0.105406     | 0.000163 | 0.000000 | 0.000718 | 0.000028 |
| L4            | k__Bacteria;p__Firmicutes;Other;Other                                                            | 9.159242       | 0.002475 | 0.040191 | 0.121258     | 0.000316 | 0.000000 | 0.001073 | 0.000087 |
| L4            | k__Bacteria;p__[Thermi];c__Deinococci;o__Deinococcales                                           | 8.644261       | 0.003281 | 0.040191 | 0.160766     | 0.000237 | 0.000000 | 0.000419 | 0.000014 |
| L2            | k__Bacteria;p__[Thermi]                                                                          | 8.557956       | 0.003440 | 0.048162 | 0.048162     | 0.000401 | 0.000079 | 0.001098 | 0.000138 |
| L6            | k__Bacteria;p__Actinobacteria;c__Actinobacteria;o__Bifidobacteriales;f__Bifidobacteriaceae;Other | 13.298507      | 0.000266 | 0.048874 | 0.048874     | 0.000081 | 0.000000 | 0.000927 | 0.000000 |
| L3            | k__Bacteria;p__Firmicutes;Other                                                                  | 9.159242       | 0.002475 | 0.049882 | 0.071765     | 0.000316 | 0.000000 | 0.001073 | 0.000087 |
| L3            | k__Bacteria;p__[Thermi];c__Deinococci                                                            | 8.557956       | 0.003440 | 0.049882 | 0.099764     | 0.000401 | 0.000079 | 0.001098 | 0.000138 |
| L5            | k__Bacteria;p__Actinobacteria;c__Actinobacteria;o__Actinomycetales;f__Geodermatophilaceae        | 9.803256       | 0.001742 | 0.069188 | 0.177687     | 0.000080 | 0.000000 | 0.000194 | 0.000007 |
| L5            | k__Bacteria;p__Proteobacteria;c__Alphaproteobacteria;o__Rhodobacterales;f__Rhodobacteraceae      | 9.415884       | 0.002151 | 0.069188 | 0.219416     | 0.000163 | 0.000000 | 0.000718 | 0.000028 |
| L5            | k__Bacteria;p__Firmicutes;Other;Other;Other                                                      | 9.159242       | 0.002475 | 0.069188 | 0.252414     | 0.000316 | 0.000000 | 0.001073 | 0.000087 |
| L5            | k__Bacteria;p__[Thermi];c__Deinococci;o__Deinococcales;f__Deinococcaceae                         | 8.644261       | 0.003281 | 0.069188 | 0.334655     | 0.000237 | 0.000000 | 0.000419 | 0.000014 |
| L5            | k__Bacteria;p__Proteobacteria;c__Alphaproteobacteria;o__Rhizobiales;Other                        | 8.468114       | 0.003614 | 0.069188 | 0.368654     | 0.000161 | 0.000000 | 0.000210 | 0.000015 |
| L5            | k__Bacteria;p__Proteobacteria;c__Gammaproteobacteria;o__Pseudomonadales;f__Moraxellaceae         | 8.252375       | 0.004070 | 0.069188 | 0.415127     | 0.000941 | 0.000078 | 0.003787 | 0.000415 |
| L5            | k__Bacteria;p__Proteobacteria;c__Gammaproteobacteria;o__Alteromonadales;f__[Chromatiaceae]       | 7.622365       | 0.005765 | 0.084003 | 0.588018     | 0.000078 | 0.000000 | 0.000939 | 0.000000 |
| L5            | k__Bacteria;p__Proteobacteria;c__Betaproteobacteria;o__Burkholderiales;f__Oxalobacteraceae       | 7.289453       | 0.006936 | 0.088435 | 0.707478     | 0.000627 | 0.000079 | 0.001570 | 0.000210 |
| L3            | k__Bacteria;p__Proteobacteria;c__Alphaproteobacteria                                             | 6.727632       | 0.009493 | 0.091766 | 0.275299     | 0.003091 | 0.000535 | 0.013294 | 0.001234 |
| L4            | k__Bacteria;p__Proteobacteria;c__Gammaproteobacteria;o__Pseudomonadales                          | 6.742862       | 0.009412 | 0.092241 | 0.461205     | 0.001881 | 0.000236 | 0.005526 | 0.002119 |
| L2            | k__Bacteria;p__Cyanobacteria                                                                     | 5.860207       | 0.015487 | 0.094764 | 0.216818     | 0.000173 | 0.000000 | 0.009548 | 0.000029 |
| L2            | k__Bacteria;p__Tenericutes                                                                       | 5.385346       | 0.020307 | 0.094764 | 0.284292     | 0.000242 | 0.000000 | 0.000952 | 0.000044 |

| CHOLN_SUPP_Diff-p-h |                                | Test-Statistic | P        | FDR_P    | Bonferroni_P | 1_median | 2_median | 1_mean   | 2_mean   |
|---------------------|--------------------------------|----------------|----------|----------|--------------|----------|----------|----------|----------|
| L                   | OTU                            |                |          |          |              |          |          |          |          |
| L2                  | k__Bacteria;p__Deferribacteres | 7.622365       | 0.005765 | 0.080708 | 0.080708     | 0.000079 | 0.000000 | 0.000558 | 0.000000 |

| LYCO_abs-B-h |                                                                  | Test-Statistic | P        | FDR_P    | Bonferroni_P | 1_median | 2_median | 1_mean   | 2_mean   |
|--------------|------------------------------------------------------------------|----------------|----------|----------|--------------|----------|----------|----------|----------|
| L            | OTU                                                              |                |          |          |              |          |          |          |          |
| L5           | k__Bacteria;p__Bacteroidetes;c__Bacteroidia;o__Bacteroidales;f__ | 11.234043      | 0.000803 | 0.081917 | 0.081917     | 0.000000 | 0.000081 | 0.000000 | 0.000220 |

| LZ_Diff-p-h |                                                                                                          | Test-Statistic | P        | FDR_P    | Bonferroni_P | 1_median | 2_median | 1_mean   | 2_mean   |
|-------------|----------------------------------------------------------------------------------------------------------|----------------|----------|----------|--------------|----------|----------|----------|----------|
| L           | OTU                                                                                                      |                |          |          |              |          |          |          |          |
| L2          | k__Bacteria;p__Verrucomicrobia                                                                           | 9.323392       | 0.002262 | 0.031675 | 0.031675     | 0.005567 | 0.000312 | 0.018291 | 0.001454 |
| L5          | k__Bacteria;p__Firmicutes;c__Clostridia;o__Clostridiales;f__                                             | 10.996407      | 0.000913 | 0.093114 | 0.093114     | 0.007557 | 0.000418 | 0.013543 | 0.003389 |
| L6          | k__Bacteria;p__Firmicutes;c__Clostridia;o__Clostridiales;f__g__                                          | 10.996407      | 0.000913 | 0.088582 | 0.167971     | 0.007557 | 0.000418 | 0.013543 | 0.003389 |
| L6          | k__Bacteria;p__Firmicutes;c__Clostridia;o__Clostridiales;f__Peptococcaceae;g__rc4-4                      | 10.473840      | 0.001211 | 0.088582 | 0.222781     | 0.000549 | 0.000000 | 0.001295 | 0.000569 |
| L6          | k__Bacteria;p__Firmicutes;c__Erysipelotrichi;o__Erysipelotrichales;f__Erysipelotrichaceae;g__Allobaculum | 10.148382      | 0.001444 | 0.088582 | 0.265747     | 0.008016 | 0.000314 | 0.025242 | 0.003092 |

| M_EGG_abs-B-h |                                                                          | Test-Statistic | P        | FDR_P    | Bonferroni_P | 1_median | 2_median | 1_mean   | 2_mean   |
|---------------|--------------------------------------------------------------------------|----------------|----------|----------|--------------|----------|----------|----------|----------|
| L             | OTU                                                                      |                |          |          |              |          |          |          |          |
| L4            | k__Bacteria;p__Firmicutes;Other;Other                                    | 11.795661      | 0.000594 | 0.011102 | 0.029091     | 0.000316 | 0.000000 | 0.001087 | 0.000073 |
| L4            | k__Bacteria;p__[Thermi];c__Deinococci;o__Deinococcales                   | 11.602388      | 0.000659 | 0.011102 | 0.032275     | 0.000237 | 0.000000 | 0.000426 | 0.000007 |
| L4            | k__Bacteria;p__Proteobacteria;c__Alphaproteobacteria;o__Sphingomonadales | 11.543946      | 0.000680 | 0.011102 | 0.033305     | 0.000309 | 0.000000 | 0.000497 | 0.000051 |
| L3            | k__Bacteria;p__Firmicutes;Other                                          | 11.795661      | 0.000594 | 0.013237 | 0.017217     | 0.000316 | 0.000000 | 0.001087 | 0.000073 |
| L3            | k__Bacteria;p__Proteobacteria;c__Alphaproteobacteria                     | 10.996407      | 0.000913 | 0.013237 | 0.026474     | 0.003091 | 0.000315 | 0.013415 | 0.001113 |
| L3            | k__Bacteria;p__[Thermi];c__Deinococci                                    | 9.344498       | 0.002237 | 0.021620 | 0.064860     | 0.000401 | 0.000079 | 0.001105 | 0.000131 |

|    |                                                                                                                 |           |          |          |          |          |          |          |          |
|----|-----------------------------------------------------------------------------------------------------------------|-----------|----------|----------|----------|----------|----------|----------|----------|
| L4 | k__Bacteria;p__Proteobacteria;c__Alphaproteobacteria;o__Rhodobacterales                                         | 9.415884  | 0.002151 | 0.022888 | 0.105406 | 0.000163 | 0.000000 | 0.000718 | 0.000028 |
| L4 | k__Bacteria;p__Proteobacteria;c__Alphaproteobacteria;o__Rhizobiales                                             | 9.028659  | 0.002658 | 0.022888 | 0.130232 | 0.001082 | 0.000079 | 0.004152 | 0.000364 |
| L4 | k__Bacteria;p__Proteobacteria;c__Alphaproteobacteria;o__Caulobacterales                                         | 8.931741  | 0.002803 | 0.022888 | 0.137326 | 0.001700 | 0.000262 | 0.005343 | 0.000604 |
| L4 | k__Bacteria;p__Proteobacteria;c__Gammaproteobacteria;o__Pseudomonadales                                         | 8.557956  | 0.003440 | 0.023566 | 0.168568 | 0.001881 | 0.000157 | 0.005562 | 0.002084 |
| L4 | k__Bacteria;p__Proteobacteria;c__Epsilonproteobacteria;o__Campylobacterales                                     | 8.354441  | 0.003847 | 0.023566 | 0.188525 | 0.000801 | 0.000000 | 0.001120 | 0.000081 |
| L3 | k__Bacteria;p__Proteobacteria;c__Epsilonproteobacteria                                                          | 8.354441  | 0.003847 | 0.027894 | 0.111576 | 0.000801 | 0.000000 | 0.001120 | 0.000081 |
| L2 | k__Bacteria;p__[Thermi]                                                                                         | 9.344498  | 0.002237 | 0.031312 | 0.031312 | 0.000401 | 0.000079 | 0.001105 | 0.000131 |
| L5 | k__Bacteria;p__Firmicutes;Other;Other;Other                                                                     | 11.795661 | 0.000594 | 0.033592 | 0.060556 | 0.000316 | 0.000000 | 0.001087 | 0.000073 |
| L5 | k__Bacteria;p__[Thermi];c__Deinococci;o__Deinococcales;f__Deinococcaceae                                        | 11.602388 | 0.000659 | 0.033592 | 0.067185 | 0.000237 | 0.000000 | 0.000426 | 0.000007 |
| L6 | k__Bacteria;p__Bacteroidetes;c__Bacteroidia;o__Bacteroidales;f__Porphyromonadaceae;g__Porphyromonas             | 12.715202 | 0.000363 | 0.040399 | 0.066736 | 0.000247 | 0.000000 | 0.001001 | 0.000036 |
| L6 | k__Bacteria;p__Firmicutes;Other;Other;Other                                                                     | 11.795661 | 0.000594 | 0.040399 | 0.109239 | 0.000316 | 0.000000 | 0.001087 | 0.000073 |
| L6 | k__Bacteria;p__[Thermi];c__Deinococci;o__Deinococcales;f__Deinococcaceae;g__Deinococcus                         | 11.602388 | 0.000659 | 0.040399 | 0.121196 | 0.000237 | 0.000000 | 0.000426 | 0.000007 |
| L5 | k__Bacteria;p__Actinobacteria;c__Actinobacteria;o__Actinomycetales;f__Geodermatophilaceae                       | 9.803256  | 0.001742 | 0.046082 | 0.177687 | 0.000080 | 0.000000 | 0.000194 | 0.000007 |
| L5 | k__Bacteria;p__Proteobacteria;c__Alphaproteobacteria;o__Rhodobacterales;f__Rhodobacteraceae                     | 9.415884  | 0.002151 | 0.046082 | 0.219416 | 0.000163 | 0.000000 | 0.000718 | 0.000028 |
| L5 | k__Bacteria;p__Proteobacteria;c__Alphaproteobacteria;o__Caulobacterales;f__Caulobacteraceae                     | 8.931741  | 0.002803 | 0.046082 | 0.285862 | 0.001700 | 0.000262 | 0.005343 | 0.000604 |
| L5 | k__Bacteria;p__Proteobacteria;c__Betaproteobacteria;o__Burkholderiales;Other                                    | 8.907625  | 0.002840 | 0.046082 | 0.289662 | 0.000481 | 0.000076 | 0.002150 | 0.000153 |
| L5 | k__Bacteria;p__Proteobacteria;c__Gammaproteobacteria;o__Pseudomonadales;f__Moraxellaceae                        | 8.636156  | 0.003296 | 0.046082 | 0.336147 | 0.000941 | 0.000078 | 0.003787 | 0.000415 |
| L5 | k__Bacteria;p__Proteobacteria;c__Alphaproteobacteria;o__Rhizobiales;Other                                       | 8.468114  | 0.003614 | 0.046082 | 0.368654 | 0.000161 | 0.000000 | 0.000210 | 0.000015 |
| L5 | k__Bacteria;p__Proteobacteria;c__Betaproteobacteria;o__Burkholderiales;f__Comamonadaceae                        | 8.205513  | 0.004176 | 0.047332 | 0.425986 | 0.001856 | 0.000079 | 0.005995 | 0.000472 |
| L5 | k__Bacteria;p__Proteobacteria;c__Alphaproteobacteria;o__Sphingomonadales;f__Sphingomonadaceae                   | 7.965916  | 0.004767 | 0.048620 | 0.486197 | 0.000158 | 0.000000 | 0.000438 | 0.000051 |
| L6 | k__Bacteria;p__Firmicutes;c__Clostridia;o__Clostridiales;f__Ruminococcaceae;g__                                 | 10.148382 | 0.001444 | 0.053422 | 0.265747 | 0.008802 | 0.000551 | 0.010086 | 0.002110 |
| L6 | k__Bacteria;p__Actinobacteria;c__Actinobacteria;o__Actinomycetales;f__Geodermatophilaceae;Other                 | 9.803256  | 0.001742 | 0.053422 | 0.320534 | 0.000080 | 0.000000 | 0.000194 | 0.000007 |
| L6 | k__Bacteria;p__Actinobacteria;c__Actinobacteria;o__Bifidobacteriales;f__Bifidobacteriaceae;Other                | 9.803256  | 0.001742 | 0.053422 | 0.320534 | 0.000081 | 0.000000 | 0.000920 | 0.000007 |
| L5 | k__Bacteria;p__Proteobacteria;c__Gammaproteobacteria;o__Alteromonadales;f__[Chromatiaceae]                      | 7.622365  | 0.005765 | 0.053456 | 0.588018 | 0.000078 | 0.000000 | 0.000939 | 0.000000 |
| L5 | k__Bacteria;p__Proteobacteria;c__Betaproteobacteria;o__Burkholderiales;f__Oxalobacteraceae                      | 7.289453  | 0.006936 | 0.058956 | 0.707478 | 0.000627 | 0.000079 | 0.001570 | 0.000210 |
| L6 | k__Bacteria;p__Proteobacteria;c__Betaproteobacteria;o__Burkholderiales;Other;Other                              | 8.907625  | 0.002840 | 0.065506 | 0.522528 | 0.000481 | 0.000076 | 0.002150 | 0.000153 |
| L6 | k__Bacteria;p__Proteobacteria;c__Alphaproteobacteria;o__Sphingomonadales;f__Sphingomonadaceae;g__Kaistobacter   | 8.902307  | 0.002848 | 0.065506 | 0.524052 | 0.000079 | 0.000000 | 0.000163 | 0.000007 |
| L6 | k__Bacteria;p__Proteobacteria;c__Alphaproteobacteria;o__Rhodobacterales;f__Rhodobacteraceae;g__Paracoccus       | 8.644261  | 0.003281 | 0.066296 | 0.603692 | 0.000163 | 0.000000 | 0.000456 | 0.000014 |
| L6 | k__Bacteria;p__Proteobacteria;c__Alphaproteobacteria;o__Rhizobiales;Other;Other                                 | 8.468114  | 0.003614 | 0.066296 | 0.665024 | 0.000161 | 0.000000 | 0.000210 | 0.000015 |
| L6 | k__Bacteria;p__Proteobacteria;c__Betaproteobacteria;o__Burkholderiales;f__Comamonadaceae;Other                  | 8.205513  | 0.004176 | 0.066296 | 0.768445 | 0.001856 | 0.000079 | 0.005995 | 0.000472 |
| L6 | k__Bacteria;p__Proteobacteria;c__Betaproteobacteria;o__Burkholderiales;f__Oxalobacteraceae;g__Janthinobacterium | 8.017965  | 0.004632 | 0.066296 | 0.852207 | 0.000627 | 0.000079 | 0.001347 | 0.000182 |
| L6 | k__Bacteria;p__Proteobacteria;c__Alphaproteobacteria;o__Pseudomonadales;f__Moraxellaceae;g__Enhydrobacter       | 7.821488  | 0.005163 | 0.066296 | 0.949968 | 0.000244 | 0.000000 | 0.001868 | 0.000029 |
| L6 | k__Bacteria;p__Proteobacteria;c__Alphaproteobacteria;o__Caulobacterales;f__Caulobacteraceae;Other               | 7.805989  | 0.005207 | 0.066296 | 0.958150 | 0.001623 | 0.000175 | 0.004623 | 0.000538 |
| L6 | k__Bacteria;p__Proteobacteria;c__Alphaproteobacteria;o__Rhizobiales;f__Rhizobiaceae;g__Agrobacterium            | 7.681906  | 0.005578 | 0.066296 | 1.000000 | 0.000161 | 0.000000 | 0.000416 | 0.000044 |
| L6 | k__Bacteria;p__Proteobacteria;c__Gammaproteobacteria;o__Alteromonadales;f__[Chromatiaceae];g__Rheinheimera      | 7.622365  | 0.005765 | 0.066296 | 1.000000 | 0.000078 | 0.000000 | 0.000203 | 0.000000 |
| L6 | k__Bacteria;p__Proteobacteria;c__Gammaproteobacteria;o__Pseudomonadales;f__Moraxellaceae;g__Alkanindiges        | 7.425528  | 0.006430 | 0.069601 | 1.000000 | 0.000165 | 0.000000 | 0.000198 | 0.000021 |
| L5 | k__Bacteria;p__Proteobacteria;c__Alphaproteobacteria;o__Rhizobiales;f__Aurantimonadaceae                        | 6.559346  | 0.010433 | 0.080510 | 1.000000 | 0.000161 | 0.000000 | 0.000289 | 0.000029 |
| L5 | k__Bacteria;p__Firmicutes;c__Clostridia;o__Clostridiales;f__[Tissierellaceae]                                   | 6.391304  | 0.011468 | 0.080510 | 1.000000 | 0.016227 | 0.002603 | 0.018571 | 0.006534 |
| L5 | k__Bacteria;p__Proteobacteria;c__Alphaproteobacteria;o__Rhizobiales;f__Rhizobiaceae                             | 6.334711  | 0.011840 | 0.080510 | 1.000000 | 0.000161 | 0.000000 | 0.000492 | 0.000117 |
| L5 | k__Bacteria;p__Proteobacteria;c__Gammaproteobacteria;o__Pseudomonadales;f__Pseudomonadaceae                     | 6.098033  | 0.013533 | 0.082798 | 1.000000 | 0.000850 | 0.000079 | 0.001775 | 0.001669 |
| L5 | k__Bacteria;p__Bacteroidetes;c__Bacteroidia;o__Bacteroidales;f__Rikenellaceae                                   | 6.063600  | 0.013800 | 0.082798 | 1.000000 | 0.009502 | 0.004313 | 0.016193 | 0.004731 |
| L4 | k__Bacteria;p__Proteobacteria;c__Gammaproteobacteria;o__Xanthomonadales                                         | 5.829029  | 0.015764 | 0.085825 | 0.772427 | 0.000432 | 0.000000 | 0.001334 | 0.000072 |
| L5 | k__Bacteria;p__Proteobacteria;c__Gammaproteobacteria;o__Xanthomonadales;f__Xanthomonadaceae                     | 5.829029  | 0.015764 | 0.089328 | 1.000000 | 0.000432 | 0.000000 | 0.001334 | 0.000072 |
| L5 | k__Bacteria;p__Proteobacteria;c__Alphaproteobacteria;o__Rhizobiales;f__Methylocystaceae                         | 5.600000  | 0.017960 | 0.096419 | 1.000000 | 0.000080 | 0.000000 | 0.000210 | 0.000059 |
| L6 | k__Bacteria;p__Firmicutes;c__Clostridia;o__Clostridiales;f__[Tissierellaceae];g__Peptoniphilus                  | 6.731433  | 0.009473 | 0.096834 | 1.000000 | 0.003336 | 0.000535 | 0.004844 | 0.001375 |

M\_MEAT\_Diff-p-h

| L  | OTU                                                                                                            | Test-Statistic | P        | FDR_P    | Bonferroni_P | 1_median | 2_median | 1_mean   | 2_mean   |
|----|----------------------------------------------------------------------------------------------------------------|----------------|----------|----------|--------------|----------|----------|----------|----------|
| L5 | k__Bacteria;p__Firmicutes;c__Clostridia;o__Clostridiales;Other                                                 | 12.165692      | 0.000487 | 0.049650 | 0.049650     | 0.037587 | 0.005322 | 0.036616 | 0.007548 |
| L5 | k__Bacteria;p__Bacteroidetes;c__Flavobacteriia;o__Flavobacteriales;f__[Weeksellaceae]                          | 9.987305       | 0.001576 | 0.053592 | 0.160776     | 0.000575 | 0.000000 | 0.000598 | 0.000028 |
| L5 | k__Bacteria;p__Proteobacteria;c__Alphaproteobacteria;o__Rhizobiales;f__Methylobacteriaceae                     | 9.987305       | 0.001576 | 0.053592 | 0.160776     | 0.000081 | 0.000000 | 0.000326 | 0.000009 |
| L2 | k__Bacteria;p__Deferribacteres                                                                                 | 8.064422       | 0.004514 | 0.063200 | 0.063200     | 0.000080 | 0.000000 | 0.000682 | 0.000000 |
| L5 | k__Bacteria;p__Firmicutes;c__Bacilli;o__Bacillales;f__Paenibacillaceae                                         | 8.934902       | 0.002798 | 0.071342 | 0.285368     | 0.004134 | 0.000000 | 0.015916 | 0.000246 |
| L6 | k__Bacteria;p__Firmicutes;c__Clostridia;o__Clostridiales;Other;Other                                           | 12.165692      | 0.000487 | 0.072507 | 0.089565     | 0.037587 | 0.005322 | 0.036616 | 0.007548 |
| L6 | k__Bacteria;p__Proteobacteria;c__Deltaproteobacteria;o__Desulfovibrionales;f__Desulfovibrionaceae;g__          | 10.009346      | 0.001557 | 0.072507 | 0.286576     | 0.000337 | 0.000000 | 0.000884 | 0.000000 |
| L6 | k__Bacteria;p__Bacteroidetes;c__Flavobacteriia;o__Flavobacteriales;f__[Weeksellaceae];g__Cloacibacterium       | 9.987305       | 0.001576 | 0.072507 | 0.290026     | 0.000575 | 0.000000 | 0.000598 | 0.000028 |
| L6 | k__Bacteria;p__Proteobacteria;c__Alphaproteobacteria;o__Rhizobiales;f__Methylobacteriaceae;g__Methylobacterium | 9.987305       | 0.001576 | 0.072507 | 0.290026     | 0.000081 | 0.000000 | 0.000326 | 0.000009 |
| L3 | k__Bacteria;p__Deferribacteres;c__Deferribacteres                                                              | 8.064422       | 0.004514 | 0.078453 | 0.130914     | 0.000080 | 0.000000 | 0.000682 | 0.000000 |
| L3 | k__Bacteria;p__Verrucomicrobia;c__Verrucomicrobiae                                                             | 7.736842       | 0.005411 | 0.078453 | 0.156905     | 0.005136 | 0.000237 | 0.006197 | 0.001781 |

|    |                                                                                                  |          |          |          |          |          |          |          |          |
|----|--------------------------------------------------------------------------------------------------|----------|----------|----------|----------|----------|----------|----------|----------|
| L6 | k__Bacteria;p__Firmicutes;c__Clostridia;o__Clostridiales;f__Veillonellaceae;g__Veillonella       | 9.319171 | 0.002268 | 0.083451 | 0.417254 | 0.001125 | 0.000158 | 0.001890 | 0.000289 |
| L5 | k__Bacteria;p__Deferrribacteres;c__Deferrribacteres;o__Deferrribacterales;f__Deferrribacteraceae | 8.064422 | 0.004514 | 0.083505 | 0.460457 | 0.000080 | 0.000000 | 0.000682 | 0.000000 |
| L5 | k__Bacteria;p__Verrucomicrobia;c__Verrucomicrobiae;o__Verrucomicrobiales;f__Verrucomicrobiaceae  | 7.736842 | 0.005411 | 0.083505 | 0.551874 | 0.005136 | 0.000237 | 0.006197 | 0.001781 |
| L5 | k__Bacteria;p__Tenericutes;c__Mollicutes;o__Anaeroplasmatales;f__Anaeroplasmataceae              | 7.633085 | 0.005731 | 0.083505 | 0.584534 | 0.000159 | 0.000000 | 0.000434 | 0.000018 |
| L6 | k__Bacteria;p__Firmicutes;c__Bacilli;o__Bacillales;f__Paenibacillaceae;g__Paenibacillus          | 8.934902 | 0.002798 | 0.085797 | 0.514781 | 0.004134 | 0.000000 | 0.015916 | 0.000246 |
| L4 | k__Bacteria;p__Deferrribacteres;c__Deferrribacteres;o__Deferrribacterales                        | 8.064422 | 0.004514 | 0.093602 | 0.221200 | 0.000080 | 0.000000 | 0.000682 | 0.000000 |
| L4 | k__Bacteria;p__Verrucomicrobia;c__Verrucomicrobiae;o__Verrucomicrobiales                         | 7.736842 | 0.005411 | 0.093602 | 0.265116 | 0.005136 | 0.000237 | 0.006197 | 0.001781 |
| L4 | k__Bacteria;p__Tenericutes;c__Mollicutes;o__Anaeroplasmatales                                    | 7.633085 | 0.005731 | 0.093602 | 0.280805 | 0.000159 | 0.000000 | 0.000434 | 0.000018 |
| L4 | k__Bacteria;p__Proteobacteria;c__Gammaproteobacteria;o__Pasteurellales                           | 7.090719 | 0.007748 | 0.094918 | 0.379672 | 0.001069 | 0.000079 | 0.002057 | 0.000198 |
| L5 | k__Bacteria;p__Proteobacteria;c__Gammaproteobacteria;o__Pasteurellales;f__Pasteurellaceae        | 7.090719 | 0.007748 | 0.098792 | 0.790338 | 0.001069 | 0.000079 | 0.002057 | 0.000198 |

#### M\_POULT\_Diff-p-h

| L  | OTU                                                                         | Test-Statistic | P        | FDR_P    | Bonferroni_P | 1_median | 2_median | 1_mean   | 2_mean   |
|----|-----------------------------------------------------------------------------|----------------|----------|----------|--------------|----------|----------|----------|----------|
| L3 | k__Bacteria;p__Bacteroidetes;c__Flavobacteriia                              | 9.759230       | 0.001784 | 0.046358 | 0.051743     | 0.000000 | 0.000665 | 0.000222 | 0.000664 |
| L3 | k__Bacteria;p__Firmicutes;c__Clostridia                                     | 8.691429       | 0.003197 | 0.046358 | 0.092716     | 0.705732 | 0.434486 | 0.661241 | 0.433531 |
| L4 | k__Bacteria;p__Bacteroidetes;c__Flavobacteriia;o__Flavobacteriales          | 9.759230       | 0.001784 | 0.047523 | 0.087428     | 0.000000 | 0.000665 | 0.000222 | 0.000664 |
| L4 | k__Bacteria;p__Firmicutes;c__Bacilli;o__Bacillales                          | 9.605714       | 0.001940 | 0.047523 | 0.095047     | 0.000710 | 0.009407 | 0.003821 | 0.045435 |
| L4 | k__Bacteria;p__Firmicutes;c__Clostridia;o__Clostridiales                    | 8.691429       | 0.003197 | 0.049882 | 0.156658     | 0.705732 | 0.434486 | 0.661241 | 0.433531 |
| L4 | k__Bacteria;p__Proteobacteria;c__Gammaproteobacteria;o__Pseudomonadales     | 8.251429       | 0.004072 | 0.049882 | 0.199528     | 0.000236 | 0.004081 | 0.001988 | 0.021900 |
| L3 | k__Bacteria;p__Proteobacteria;c__Epsilonproteobacteria                      | 7.260826       | 0.007047 | 0.068126 | 0.204377     | 0.000000 | 0.000553 | 0.000235 | 0.002407 |
| L4 | k__Bacteria;p__Proteobacteria;c__Epsilonproteobacteria;o__Campylobacterales | 7.260826       | 0.007047 | 0.069065 | 0.345327     | 0.000000 | 0.000553 | 0.000235 | 0.002407 |
| L4 | k__Bacteria;p__Proteobacteria;c__Betaproteobacteria;o__Neisseriales         | 6.162162       | 0.013051 | 0.083703 | 0.639507     | 0.000000 | 0.000160 | 0.000016 | 0.000427 |
| L4 | k__Bacteria;p__Firmicutes;c__Erysipelotrichi;o__Erysipelotrichales          | 5.851429       | 0.015564 | 0.083703 | 0.762656     | 0.005183 | 0.040020 | 0.013116 | 0.042310 |
| L4 | k__Bacteria;p__Proteobacteria;c__Gammaproteobacteria;o__Xanthomonadales     | 5.575267       | 0.018216 | 0.083703 | 0.892578     | 0.000078 | 0.000364 | 0.001406 | 0.000778 |
| L4 | k__Bacteria;p__Proteobacteria;c__Alphaproteobacteria;o__Rhizobiales         | 5.507994       | 0.018930 | 0.083703 | 0.927558     | 0.000198 | 0.001706 | 0.001215 | 0.004012 |
| L4 | k__Bacteria;p__Tenericutes;c__Mollicutes;o__Anaeroplasmatales               | 5.505268       | 0.018959 | 0.083703 | 0.929004     | 0.000000 | 0.000158 | 0.000049 | 0.000357 |
| L4 | k__Bacteria;p__Proteobacteria;c__Betaproteobacteria;o__Burkholderiales      | 5.491429       | 0.019110 | 0.083703 | 0.936386     | 0.003102 | 0.012797 | 0.009054 | 0.015575 |
| L4 | k__Bacteria;p__Proteobacteria;c__Alphaproteobacteria;o__Rhodobacterales     | 5.368917       | 0.020499 | 0.083703 | 1.000000     | 0.000000 | 0.000359 | 0.000250 | 0.001849 |

#### M161\_abs-B-h

| L  | OTU                          | Test-Statistic | P        | FDR_P    | Bonferroni_P | 1_median | 2_median | 1_mean   | 2_mean   |
|----|------------------------------|----------------|----------|----------|--------------|----------|----------|----------|----------|
| L2 | k__Bacteria;p__Bacteroidetes | 7.426159       | 0.006428 | 0.089995 | 0.089995     | 0.116732 | 0.356100 | 0.143820 | 0.332204 |

#### VITD\_SUPP\_abs-B-h

| L  | OTU                     | Test-Statistic | P        | FDR_P    | Bonferroni_P | 1_median | 2_median | 1_mean   | 2_mean   |
|----|-------------------------|----------------|----------|----------|--------------|----------|----------|----------|----------|
| L2 | k__Bacteria;Other       | 8.856382       | 0.002921 | 0.040889 | 0.040889     | 0.000161 | 0.000000 | 0.000312 | 0.000050 |
| L3 | k__Bacteria;Other;Other | 8.856382       | 0.002921 | 0.084699 | 0.084699     | 0.000161 | 0.000000 | 0.000312 | 0.000050 |

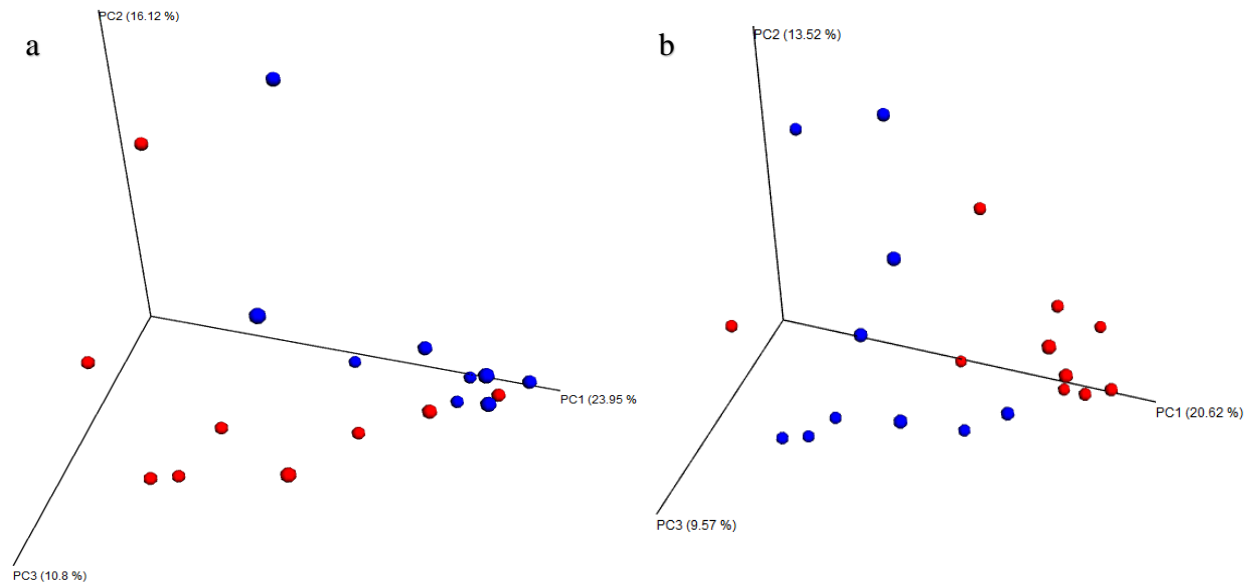

Supplementary Figure. Bray-Curtis PCoA plots for a) percent-change in red meat consumption (PERMANOVA  $p=0.026$ ) and b) percent-change in poultry consumption (PERMANOVA  $p=0.011$ ). For both plots, red dots represent men in the lower half of the distribution of percent-change in consumption of the specific food group, while blue dots represent men in the upper half. From baseline to follow-up, changes in red meat consumption ranged from -1.9 to +2.8 ounces per day; changes in poultry consumption ranged from -3.9 to +5.8 ounces per day.
